# Supplementary material for: Therapeutic Potential of Resveratrol for Glioma: A Systematic Review and Meta-Analysis of Animal Model Studies
Source: MDPI journal article supplement (doi:10.3390/ijms242316597), 2023-11-22
Supplement: s1 [file s1]

**Table S1:** Characteristics of the 10 included studies in this systematic review with meta-analysis.

| Study              | Year | Cells                         | Animals                               | Intervention                                     | Outcome analyzed           | Model used                                                        | Dose                                                           | Duration of the treatment | Administration mode                                                         |
|--------------------|------|-------------------------------|---------------------------------------|--------------------------------------------------|----------------------------|-------------------------------------------------------------------|----------------------------------------------------------------|---------------------------|-----------------------------------------------------------------------------|
| Yi, et al [1]      | 2023 | U87MG-mCherry-luc             | BALB/c nude female mice               | Normal                                           | Fluorescence of the tumors | Orthotopic xenografts GBM mice                                    | -                                                              | 13 days                   | -                                                                           |
|                    |      |                               |                                       | Interferon-elastin-like polypeptide (IFN-ELP(V)) |                            |                                                                   | 1 mg IFN-equivalent/mouse                                      |                           | Administered into de center of the tumor                                    |
|                    |      |                               |                                       | Resveratrol (RES)                                |                            |                                                                   | 12.5 mg/kg body weight/day                                     |                           | Intraperitoneal injection/daily                                             |
|                    |      |                               |                                       | IFN-ELP(V) + RES                                 |                            |                                                                   | 1 mg IFN-equivalent/mouse + 12.5 mg/kg body weight             |                           | Administered into de center of the tumor + Intraperitoneal injection/daily  |
| Lin, et al [2]     | 2021 | Rat C6 glioblastoma cell line | Male BALB/c nude mice                 | Normal (saline)                                  | Tumor volume               | Heterotopic (subcutaneous)                                        | 30 mg/kg/2 in 2 days                                           | 12 days                   | Intraperitoneal, 6 times in 2-day intervals                                 |
|                    |      |                               |                                       | Free Resveratrol                                 |                            |                                                                   |                                                                |                           |                                                                             |
|                    |      |                               |                                       | PP@Res Nanoparticles                             |                            |                                                                   |                                                                |                           |                                                                             |
|                    |      |                               |                                       | Pep-PP@Res Nanoparticles                         |                            |                                                                   |                                                                |                           |                                                                             |
| Yang, et al [3]    | 2018 | T98G (human)                  | Specific-pathogen-free male nude mice | Control (DMSO)                                   | Tumor volume               | Xenografts (injection in the left armpit)                         | -                                                              | 30 days                   | Intraperitoneal                                                             |
|                    |      |                               |                                       | Resveratrol                                      |                            |                                                                   | 10 mg/kg/day                                                   |                           |                                                                             |
|                    |      |                               |                                       | Temozolomide                                     |                            |                                                                   | 25 mg/kg/day                                                   |                           |                                                                             |
|                    |      |                               |                                       | RV + TMZ                                         |                            |                                                                   | -                                                              |                           |                                                                             |
|                    |      |                               |                                       | RV + TMZ + IWR-1                                 |                            |                                                                   | plus 10 mmol/kg lithium chloride/day                           |                           |                                                                             |
|                    |      |                               |                                       | RV + TMZ + LiCl                                  |                            |                                                                   | plus 25 mmol/kg IWR-1, the Wnt signaling pathway inhibitor/day |                           |                                                                             |
| Jhaveri, et al [4] | 2018 | U-87 human glioblastoma       | Female athymic NCr-nu/nu nide mice    | LP-resveratrol                                   | Tumor volume               | Xenografts (injected subcutaneously over the left flank)          | 100 µL or 300 µM                                               | 18 days                   | via the tail vein                                                           |
|                    |      |                               |                                       | Control (PBS)                                    |                            |                                                                   | -                                                              |                           |                                                                             |
|                    |      |                               |                                       | PL (liposomes without Resveratrol)               |                            |                                                                   | -                                                              |                           |                                                                             |
|                    |      |                               |                                       | Free Resveratrol                                 |                            |                                                                   | 6 mg resveratrol dissolved in 20% solution 2HPβCD              |                           |                                                                             |
|                    |      |                               |                                       | RES-L (liposomes)                                |                            |                                                                   | 10 mg/kg resveratrol equivalent in 2 days                      |                           |                                                                             |
| Xu, et al [5]      | 2017 | U87                           | Nude mice                             | Tf-RES-L (transferrin-resveratrol liposomes)     | Relative tumor volume      | Xenografts (injected subcutaneously into the left axillary space) | 10 mg/kg resveratrol equivalent                                | 14 days                   | Intraperitoneal                                                             |
|                    |      |                               |                                       | Control                                          |                            |                                                                   | -                                                              |                           |                                                                             |
|                    |      |                               |                                       | Resveratrol                                      |                            |                                                                   | 10 mg/kg                                                       |                           |                                                                             |
|                    |      |                               |                                       | Temozolomide                                     |                            |                                                                   | 30 mg/kg                                                       |                           |                                                                             |
|                    |      |                               |                                       | Temozolomide + Resveratrol                       |                            |                                                                   | Equivalent dose                                                |                           |                                                                             |
|                    |      |                               |                                       | T/R-NPs                                          |                            |                                                                   | Equivalent dose                                                |                           |                                                                             |
| Clark, et al [6]   | 2017 | U87 glioma cells              | Female BALB/c nude mice               | Resveratrol                                      | Tumor size                 | Xenografts (subcutaneous injection)                               | 100 µL or 300 µM                                               | 18 days                   | Oral                                                                        |
|                    |      |                               |                                       | Control (vehicle)                                |                            |                                                                   | -                                                              |                           |                                                                             |
| Wang, et al [7]    | 2015 | Human GSC line SU-2           | Male nude BALB/c mice                 | Resveratrol                                      | Relative tumor volume      |                                                                   | water containing 0.1 mg/mL resveratrol ad libitum              | 14 days                   | day 3 and day 9 with a dose rate of 2 Gy/min; Intraperitoneal injection/day |
|                    |      |                               |                                       | Control (saline solution)                        |                            |                                                                   | -                                                              |                           |                                                                             |
|                    |      |                               |                                       | X-ray                                            |                            |                                                                   | 6 Gy                                                           |                           |                                                                             |

|                             |                  |                                     |                      |                                       |              |                                                      |                             |         |                                                     |         |
|-----------------------------|------------------|-------------------------------------|----------------------|---------------------------------------|--------------|------------------------------------------------------|-----------------------------|---------|-----------------------------------------------------|---------|
| Li, et al<br>[8]            | 2015             | Human glioblastoma initiating cells | Female NOD/SCID mice | Resveratrol                           | Tumor volume | Xenografts (implanted subcutaneously)                | 150 mg/kg/day               | 30 days | oral gavage; resveratrol injected intraperitoneally |         |
|                             |                  |                                     |                      | X-ray + Resveratrol                   |              |                                                      | 6 Gy + 150 mg/kg            |         |                                                     |         |
|                             |                  |                                     |                      | Control                               |              |                                                      | -                           |         |                                                     |         |
|                             |                  |                                     |                      | Temozolomide                          |              |                                                      | 68 mg/kg                    |         |                                                     |         |
|                             |                  |                                     |                      | Resveratrol                           |              |                                                      | 12.5 mg/kg/day              |         |                                                     |         |
|                             |                  |                                     |                      | Temozolomide + Resveratrol            |              |                                                      | Equivalent doses            |         |                                                     |         |
|                             |                  |                                     |                      | Curcumin                              |              |                                                      | 50 mg/kg                    |         |                                                     | 14 days |
|                             |                  |                                     |                      | Resveratrol                           |              |                                                      | 10 mg/kg/day                |         |                                                     | -       |
|                             |                  |                                     |                      | Temozolomide                          |              |                                                      | 10 mg/kg/3 per week         |         |                                                     | -       |
|                             |                  |                                     |                      | Temozolomide + Curcumin               |              |                                                      | Equivalent doses            |         |                                                     | -       |
|                             |                  |                                     |                      | Temozolomide + Resveratrol            |              |                                                      | Equivalent doses            |         |                                                     | -       |
|                             |                  |                                     |                      | Temozolomide + Curcumin + Resveratrol |              |                                                      | Equivalent doses            |         |                                                     | -       |
|                             |                  |                                     |                      | Temozolomide + Chloroquine            |              |                                                      | Equivalent doses + 20 mg/kg |         |                                                     | -       |
|                             |                  |                                     |                      | Temozolomide + Curcumin + Chloroquine |              |                                                      | Equivalent doses            |         |                                                     | -       |
|                             |                  |                                     |                      | Chloroquine                           |              |                                                      | Equivalent doses            |         |                                                     | -       |
|                             |                  |                                     |                      | Lipid-core nanocapsules (LNC)         |              |                                                      | -                           |         |                                                     | -       |
|                             |                  |                                     |                      | Resveratrol                           |              |                                                      | 5 mg/kg/day                 |         |                                                     | -       |
|                             |                  |                                     |                      | Resveratrol-LNC                       |              |                                                      | 5 mg/kg/day                 |         |                                                     | -       |
|                             |                  |                                     |                      | Resveratrol                           |              |                                                      | 40 mg/kg                    |         |                                                     | -       |
|                             |                  |                                     |                      | Temozolomide                          |              |                                                      | 68 mg/kg                    |         |                                                     |         |
|                             |                  |                                     |                      | Resveratrol + Temozolomide            |              |                                                      | Equivalent doses            |         |                                                     |         |
|                             |                  |                                     |                      | Lin, et al [9]                        |              |                                                      | 2012                        |         |                                                     | U87     |
| Temozolomide                | 10 mg/kg/day     |                                     |                      |                                       |              |                                                      |                             |         |                                                     |         |
| Resveratrol                 | 12.5 mg/kg/day   |                                     |                      |                                       |              |                                                      |                             |         |                                                     |         |
| Temozolomide + Resveratrol  | Equivalent doses |                                     |                      |                                       |              |                                                      |                             |         |                                                     |         |
| CD133+/Sh-Scramble          | -                |                                     |                      |                                       |              |                                                      |                             |         |                                                     |         |
| CD133+/Resveratrol          | -                |                                     |                      |                                       |              |                                                      |                             |         |                                                     |         |
| CD133+/Sh-STAT3             | -                |                                     |                      |                                       |              |                                                      |                             |         |                                                     |         |
| CD133+/Sh-STAT3+Resveratrol | -                |                                     |                      |                                       |              |                                                      |                             |         |                                                     |         |
| Tseng, et al [10]           | 2004             | rat RT-2 glioma cell line           | Fischer 344 rats     | Control                               | Tumor volume | Orthotopic (injected into the right caudate-putamen) | -                           | 28 days | Intraperitoneal injection                           |         |
|                             |                  |                                     |                      | Vehicle                               |              |                                                      | -                           |         |                                                     |         |
|                             |                  |                                     |                      | Resveratrol                           |              |                                                      | 40 mg/kg/day                |         |                                                     |         |

**Table S2:** Study quality scores.

| Study              | Year | 1 | 2 | 3 | 4 | 5 | 6 | 7 | 8 | 9 | Quality score |
|--------------------|------|---|---|---|---|---|---|---|---|---|---------------|
| Yi, et al [1]      | 2023 | + | + | + | - | - | + | + | + | - | 6             |
| Lin, et al [2]     | 2021 | + | + | + | - | - | + | + | + | - | 6             |
| Yang, et al [3]    | 2018 | + | + | + | - | - | + | + | - | - | 5             |
| Jhaveri, et al [4] | 2018 | + | + | + | - | - | + | - | + | - | 5             |
| Xu, et al [5]      | 2017 | + | + | - | - | - | + | + | - | - | 4             |
| Clark, et al [6]   | 2017 | + | + | + | - | - | + | - | + | - | 5             |
| Wang, et al [7]    | 2015 | + | + | + | - | - | + | + | + | - | 6             |
| Li, et al [8]      | 2015 | + | + | - | - | - | + | - | + | - | 4             |
| Lin, et al [9]     | 2012 | + | - | + | - | - | - | - | + | - | 3             |
| Tseng, et al [10]  | 2004 | + | + | - | - | - | - | - | + | - | 3             |

- 1) Peer-review publication;  
2) Standardized number of tumor cells implanted;  
3) Randomized allocation of tumor-bearing animals to treatment and control groups;  
4) Blinded assessment of outcome;  
5) Sample size calculation performed;  
6) Compliance with animal welfare regulations;  
7) Statement of potential conflicts of interest;  
8) Reported the number of animals originally inoculated with tumor cells;  
9) Reported the explanation of any treated animals excluded from analysis.

**Table S3.** Assessment of publication bias for the impact of administration of temozolomide combined with resveratrol on glioma growth.

| Outcome                                 | Egger's regression test |          |                 |    |
|-----------------------------------------|-------------------------|----------|-----------------|----|
|                                         | 95%CI                   | <i>t</i> | <i>p</i> -value | df |
| Tumor volume (fold increase from day 1) | -13.896 to 6.914        | 1.444    | 0.286           | 2  |

CI – confidence interval; df – degrees of freedom.

**Figure S1:** Results of sensitivity analysis for the meta-analysis of the of administration of temozolomide combined with resveratrol on glioma growth.

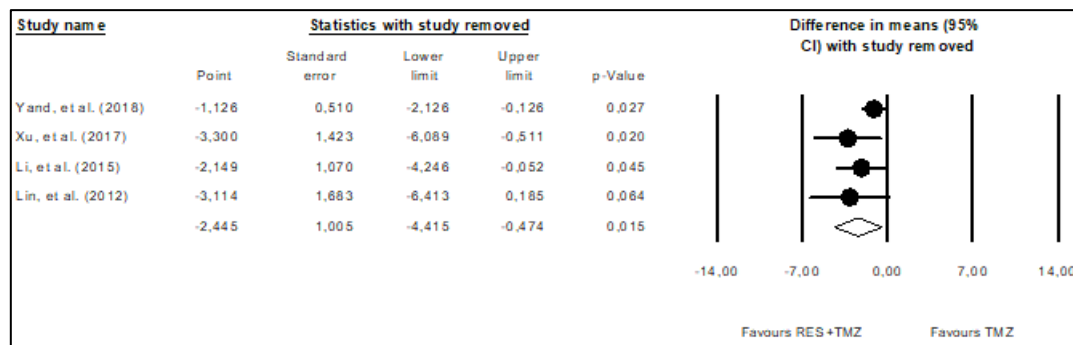

**Figure S2:** Funnel plot of standard error by difference in means (publication bias tests) of the effects of administration of temozolomide combined with resveratrol on glioma growth.

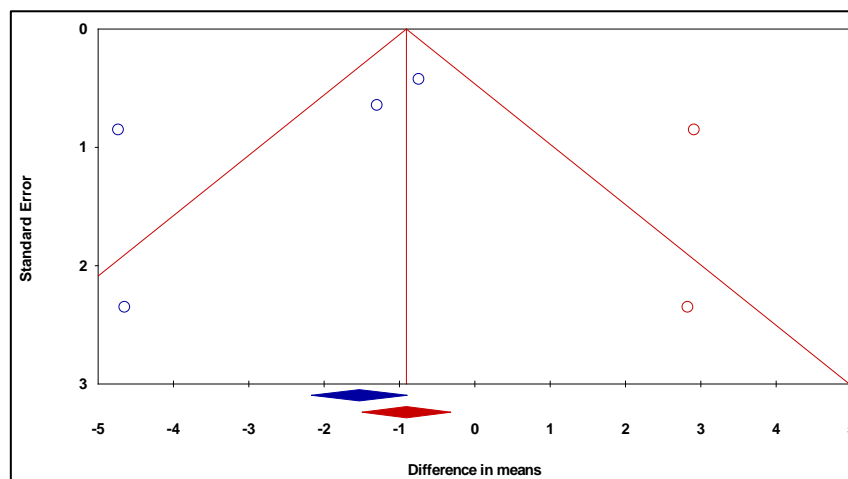

## References

- Yi, G.; Liu, H.; Sun, F.; Du, R.; Kong, J.; Wang, H.; Cheng, H.; Wang, G.; Gao, F.; Liang, P. Intratumor Injection of Thermosensitive Polypeptide with Resveratrol Inhibits Glioblastoma Growth. *Tissue Eng. Part C Methods* **2023**, *29*, 103–109. <https://doi.org/10.1089/ten.tec.2022.0207>.
- Lin, X.; Shi, X.; Xiong, L.; Nie, J.; Ye, H.; Du, J.; Liu, J. Construction of il-13 receptor  $\alpha 2$ -targeting resveratrol nanoparticles against glioblastoma cells: Therapeutic efficacy and molecular effects. *Int. J. Mol. Sci.* **2021**, *22*, 10622. <https://doi.org/10.3390/ijms221910622>.
- Yang, H.-C.; Wang, J.-Y.; Bu, X.-Y.; Yang, B.; Wang, B.-Q.; Hu, S.; Yan, Z.-Y.; Gao, Y.-S.; Han, S.-Y.; Qu, M.-Q. Resveratrol restores sensitivity of glioma cells to temozolamide through inhibiting the activation of Wnt signaling pathway. *J. Cell. Physiol.* **2019**, *234*, 6783–6800. <https://doi.org/10.1002/jcp.27409>.
- Jhaveri, A.; Deshpande, P.; Pattni, B.; Torchilin, V. Transferrin-targeted, resveratrol-loaded liposomes for the treatment of glioblastoma. *J. Control. Release* **2018**, *277*, 89–101. <https://doi.org/10.1016/j.jconrel.2018.03.006>.
- Xu, H.; Jia, F.; Singh, P.K.; Ruan, S.; Zhang, H.; Li, X. Synergistic anti-glioma effect of a coloaded nano-drug delivery system. *Int. J. Nanomed.* **2017**, *12*, 29–40. <https://doi.org/10.2147/IJN.S116367>.
- Clark, P.A.; Bhattacharya, S.; Elmayan, A.; Darjatmoko, S.R.; Thuro, B.A.; Yan, M.B.; van Ginkel, P.R.; Polans, A.S.; Kuo, J.S. Resveratrol targets AKT and p53 in glioblastoma and glioblastoma stem-like cells to suppress growth and infiltration. *J. Neurosurg.* **2017**, *126*, 1448–1460. <https://doi.org/10.3171/2016.1.JNS152077>.
- Wang, L.; Long, L.; Wang, W.; Liang, Z. Resveratrol, a potential radiation sensitizer for glioma stem cells both in vitro and in vivo. *J. Pharmacol. Sci.* **2015**, *129*, 216–225. <https://doi.org/10.1016/j.jphs.2015.11.001>.
- Li, H.; Liu, Y.; Jiao, Y.; Guo, A.; Xu, X.; Qu, X.; Wang, S.; Zhao, J.; Li, Y.; Cao, Y. Resveratrol sensitizes glioblastoma-initiating cells to temozolomide by inducing cell apoptosis and promoting differentiation. *Oncol. Rep.* **2016**, *35*, 343–351. <https://doi.org/10.3892/or.2015.4346>.
- Lin, C.J.; Lee, C.; Shih, Y.; Lin, T.; Wang, S.; Lin, Y.; Shih, C. Resveratrol enhances the therapeutic effect of temozolomide against malignant glioma in vitro and in vivo by inhibiting autophagy. *Free Radic. Biol. Med.* **2012**, *52*, 377–391. <https://doi.org/10.1016/j.freeradbiomed.2011.10.487>.
- Tseng, S.; Lin, S.; Chen, J.; Su, Y.; Huang, H.; Chen, C.; Lin, P.; Chen, Y. Resveratrol Suppresses the Angiogenesis and Tumor Growth of Gliomas in Rats. *Crit. Cancer Res.* **2004**, *10*, 2190–2205. <https://doi.org/10.1158/1078-0432.ccr-03-0105>.
